# Supplementary material for: Strategic defect control of perovskite nanocrystallites with octylammonium iodide toward efficient red perovskite light-emitting diodes with high operative stability
Source: Royal Society of Chemistry journal article supplement (doi:10.1039/d4ta00369a), 2024-01-01
Supplement: d4ta00369a1.pdf [file d4ta00369a1.pdf]

*Supplementary Data*

Strategic Defect Control of Perovskite Nanocrystallites  
with Octylammonium Iodide Toward Efficient Red  
Perovskite Light-Emitting Diodes with High Operative  
Stability

*Seo Yeon Han<sup>§§</sup>, Jung Jae Do,<sup>§, §§</sup> and Jae Woong Jung<sup>§, §§\*</sup>*

<sup>§</sup>Department of Advanced Materials Engineering for Information & Electronics, Kyung Hee University, 1732 Deogyong-daero, Giheung-gu, Yongin-si, Gyeonggi-do 446-701, Republic of Korea

<sup>§§</sup>Integrated Education Institute for Frontier Materials (BK21 Four), Kyung Hee University, 1732 Deogyong-daero, Giheung-gu, Yongin-si, Gyeonggi-do 446-701, Republic of Korea

**Table S1.** XRD peak parameters from perovskite films with and without OAI.

| Sample    | Peak <sub>(100)</sub><br>(2 $\theta$ , degree) | $d_{(100)}$<br>(Å) | FWHM <sub>(100)</sub><br>(2 $\theta$ , degree) | $D_{(100)}$<br>(nm) | Peak <sub>(200)</sub><br>(2 $\theta$ , degree) | $d_{(200)}$<br>(Å) | FWHM <sub>(200)</sub><br>(2 $\theta$ , degree) | $D_{(200)}$<br>(nm) |
|-----------|------------------------------------------------|--------------------|------------------------------------------------|---------------------|------------------------------------------------|--------------------|------------------------------------------------|---------------------|
| Pristine  | 14.32                                          | 3.117              | 0.83357                                        | 10.04               | 28.92                                          | 1.593              | 1.9315                                         | 4.44                |
| 2mol% OAI | 14.34                                          | 3.113              | 0.63848                                        | 13.10               | 28.98                                          | 1.591              | 1.06925                                        | 8.02                |

**Table S2.** Fluorescence analysis parameters of perovskite films based on multi-ligand systems with varied OAI concentration.

| Con. OAI<br>(mol%) | Steady-state PL               |                            |                  | TRPL             |              |              |                             |
|--------------------|-------------------------------|----------------------------|------------------|------------------|--------------|--------------|-----------------------------|
|                    | $\lambda_{\text{PL}}$<br>(nm) | FWHM <sub>PL</sub><br>(nm) | $\tau_1$<br>(ns) | $\tau_2$<br>(ns) | $f_1$<br>(%) | $f_2$<br>(%) | $\tau_{\text{avg}}$<br>(ns) |
| N/A                | 643                           | 53.23                      | 2.17             | 10.41            | 63.90        | 36.10        | 5.15                        |
| 1                  | 640                           | 45.84                      | 2.49             | 12.75            | 55.49        | 44.51        | 7.06                        |
| 2                  | 639                           | 45.37                      | 3.23             | 25.30            | 40.14        | 59.86        | 16.44                       |
| 3                  | 637                           | 47.57                      | 2.63             | 12.63            | 58.98        | 41.02        | 6.73                        |
| 4                  | 634                           | 48.26                      | 2.25             | 11.33            | 58.15        | 41.85        | 6.05                        |

**Table S3.** Summary of PL and EL properties of perovskite films and corresponding PeLEDs with varied concentration of OAI.

| Con. OAI<br>(mol%) | $V_{\text{on}}$<br>(V) | EL <sub>Max</sub><br>(cd m <sup>-2</sup> ) | EQE<br>(%) | CIE<br>(x, y)  | LT50<br>(min) |
|--------------------|------------------------|--------------------------------------------|------------|----------------|---------------|
| N/A                | 1.59                   | 685.08                                     | 0.92       | (0.715, 0.284) | 348           |
| 1                  | 1.59                   | 840.60                                     | 2.44       | (0.712, 0.287) | -             |
| 2                  | 1.59                   | 962.15                                     | 8.62       | (0.711, 0.288) | 1080          |
| 3                  | 1.59                   | 783.00                                     | 5.58       | (0.712, 0.287) | -             |
| 4                  | 1.59                   | 778.33                                     | 3.72       | (0.712, 0.288) | -             |

**Table S4.** Summary of EL properties of red-emitting PeLEDs reported elsewhere.

| Ref.      | Perovskite composition                                                                      | $V_{\text{on}}$<br>(V) | $EL_{\text{Max}}$<br>( $\text{cd}/\text{m}^2$ ) | $\lambda_{\text{EL}}$<br>(nm) | FWHM<br>(nm) | EQE<br>(%) | LT50    |
|-----------|---------------------------------------------------------------------------------------------|------------------------|-------------------------------------------------|-------------------------------|--------------|------------|---------|
| This work | OAI(PEAI, IBAB, and PDAB)<br>$\text{CsPbI}_x\text{Br}_{3-x}$                                | 1.59                   | 962                                             | 657                           | 35.5         | 8.62       | 18 h    |
| S1        | $(\text{PEA}/\text{m-F-PEA})_x\text{NMA}_{1-x}\text{CsPb}_2\text{I}_7$                      | 2.5                    | 1300                                            | 680                           | 39           | 25.8       | 34 min  |
| S2        | $\text{CsPbI}_{3-x}\text{Br}_x$                                                             | 2.6                    | 3100                                            | 666                           | -            | 21.2       | 4807 h  |
| S3        | $\text{FA}_{0.33}\text{Cs}_{0.67}\text{Pb}(\text{I}_{0.7}\text{Br}_{0.3})_3$                | 3                      | 400                                             | 694                           | 37           | 20.9       | 14 h    |
| S4        | $\text{CsPbI}_3$                                                                            | 2.9                    | 60                                              | 692                           | 36           | 14.8       | 20 h    |
| S5        | $\text{CsPbI}_{3-x}\text{Br}_x$                                                             | 2.9                    | 3100                                            | 637                           | -            | 4.5        | 45 min  |
| S6        | $\text{CsPbI}_{3-x}\text{Br}_x$                                                             | 1.6                    | 2859                                            | 659                           | -            | 8.94       | 2.2 min |
| S7        | $\text{FA}_{0.47}\text{Cs}_{0.53}\text{Pb}(\text{I}_{0.87}\text{Br}_{0.13})_3$              | 3.3                    | 8547                                            | 662                           | -            | 4.9        | 3 h     |
| S8        | $\text{FA}_x\text{Cs}_{1-x}\text{Pb}(\text{I}_y\text{Br}_{1-y})_3$                          | 1.6                    | 1000                                            | 692                           | 32           | 17.1       | 563 min |
| S9        | $\text{CsPbI}_3$                                                                            | 2.0                    | 440                                             | 688                           | -            | 3.7        | 5 h     |
| S10       | $\text{POEA}_2\text{Cs}_{n-1}\text{Pb}_n\text{I}_{3n+1}$                                    | 2.5                    | 2545                                            | 653                           | -            | 18.5       | 131 min |
| S11       | $\text{PEA}_2(\text{Cs}_{0.3}\text{MA}_{0.7})_2(\text{Zn}_x\text{Pb}_{1-x})_3\text{I}_{10}$ | 1.7                    | 453                                             | 658                           | -            | 9.5        | 3.2 min |
| S12       | $\text{CsPbBr}_{0.6}\text{I}_{2.4}$                                                         | 1.6                    | 1359                                            | 670                           | 34           | 9.1        | 20 h    |
| S13       | $(\text{PEA}:\text{NMA})_2\text{Cs}_{n-1}\text{Pb}_n\text{I}_{3n+1}$                        | 2.8                    | 1453                                            | 635                           | 42           | 12.41      | 103 min |
| S14       | $(\text{PBA}_x\text{MBZA}_{1-x})_2\text{Cs}_{n-1}\text{Pb}_n\text{I}_{3n+1}$                | 3.0                    | 1724                                            | 640                           | 42           | 10.8       | 25 min  |
| S15       | $\text{CsPbI}_{3-x}\text{Br}_x$                                                             | 1.9                    | 10745                                           | 671                           | 28           | 17.03      | 15.4 h  |
| S16       | $\text{CsPbI}_3$                                                                            | 2.0                    | 340                                             | 700                           | -            | 10.4       | 20 min  |
| S17       | $\text{CsPbI}_3$                                                                            | 2.6                    | 1272                                            | 699                           | -            | 15.03      | 1.7 h   |
| S18       | $\text{Cs}_{1-x}\text{EA}_x\text{PbI}_3$                                                    | 1.7                    | 403                                             | 694                           | -            | 17.5       | 4 min   |
| S19       | $\text{CsPbI}_3$                                                                            | 3.2                    | 800                                             | 691                           | 36           | 14.8       | 6 h     |
| S20       | $\text{FA}_{0.47}\text{Cs}_{0.53}\text{Pb}(\text{I}_{0.87}\text{Br}_{0.13})_3$              | 2.0                    | 1408                                            | 690                           | 34           | 8.7        | 8 h     |
| S21       | $\text{CsPbBr}_{0.6}\text{I}_{2.4}$                                                         | 1.6                    | 7798                                            | 683                           | -            | 7.8        | 95 min  |
| S22       | $\text{CsPbI}_3$                                                                            | 2.8                    | 210                                             | 682                           | -            | 8.65       | 6 h     |
| S23       | $\text{POEA}_2\text{CsPb}_2\text{I}_7$                                                      | 2.8                    | 2377                                            | 650                           | 42           | 18.7       | 476 min |

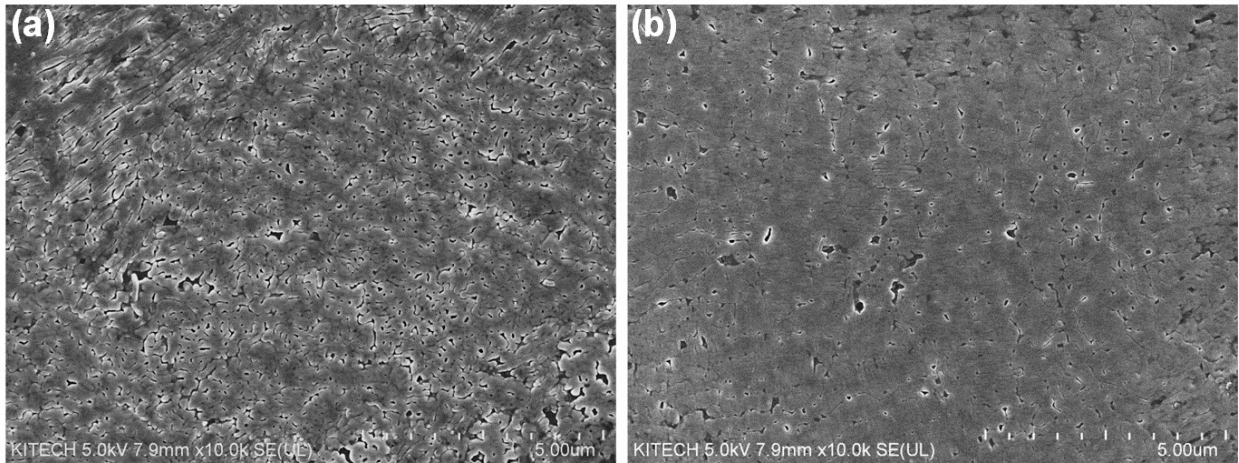

**Figure S1.** (a) SEM image with lower magnification for pristine and (b) OAI-modified perovskite films.

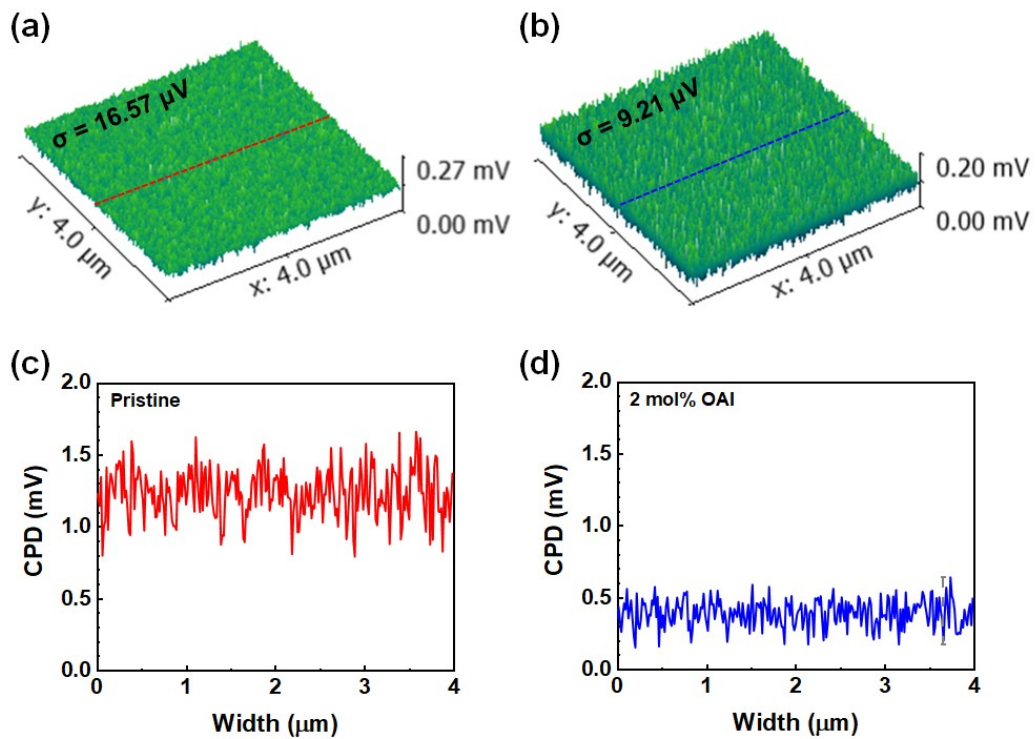

**Figure S2.** (a) 3D view of KPFM images for the pristine perovskite film and (b) OAI-modified perovskite films. (c) Line profile of CPD for pristine and (d) OAI-modified film.

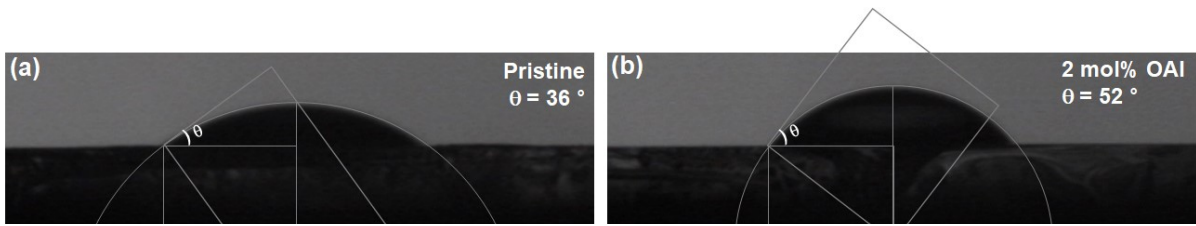

**Figure S3.** Contact angle measurement of water droplet onto the perovskite films without and with OAI incorporation (2 mol%).

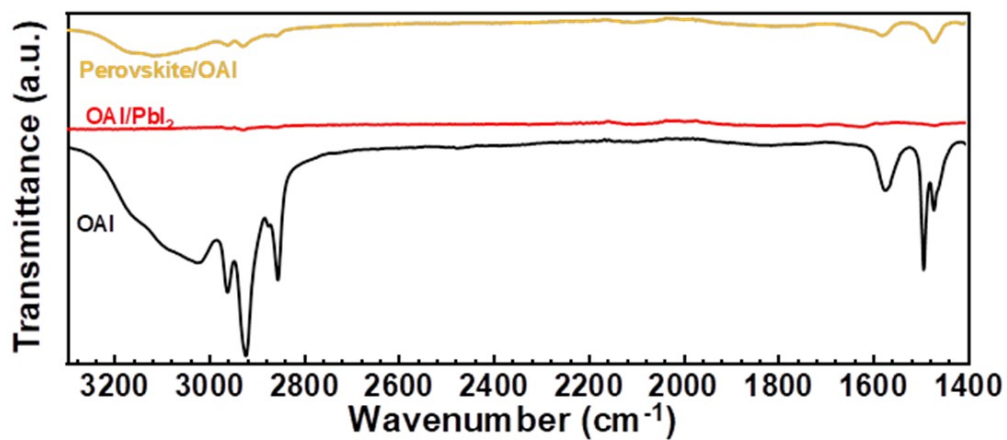

**Figure S4.** FT-IR full-scan spectra of OAI, OAI mixed with  $\text{PbI}_2$ , and OAI mixed with perovskite films.

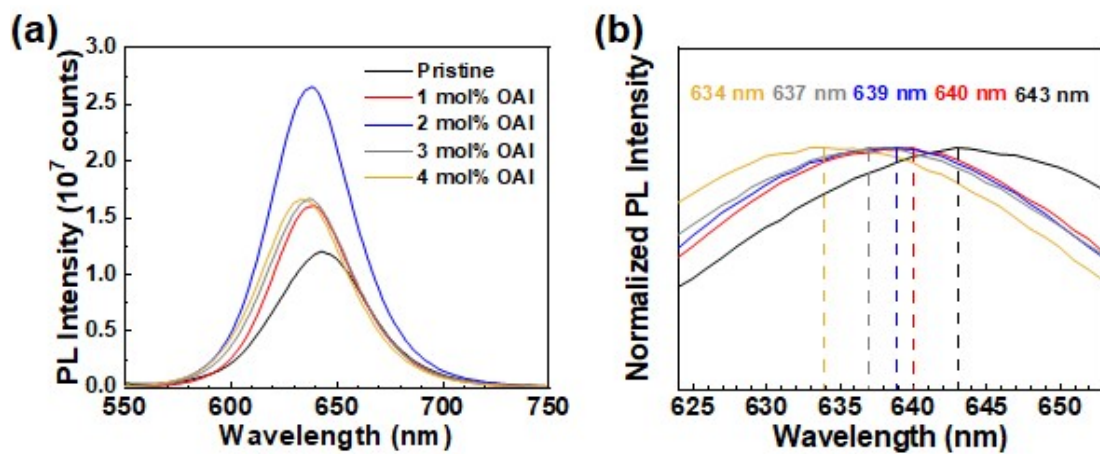

**Figure S5.** (a) PL spectra, and (b) normalized spectra of perovskite films with varied OAI concentration.

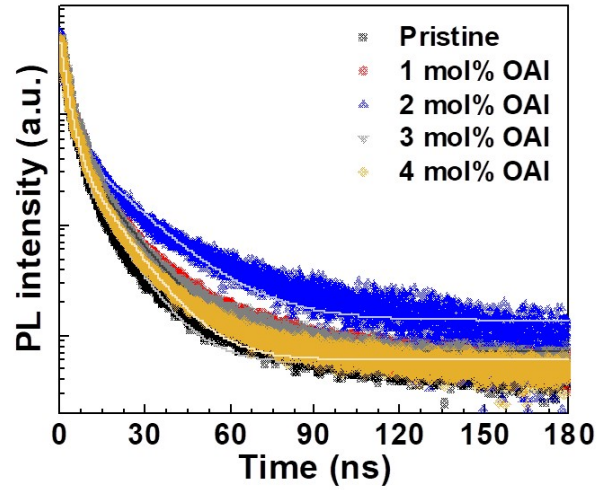

**Figure S6.** TRPL decay curves of perovskite films with varied OAI concentration.

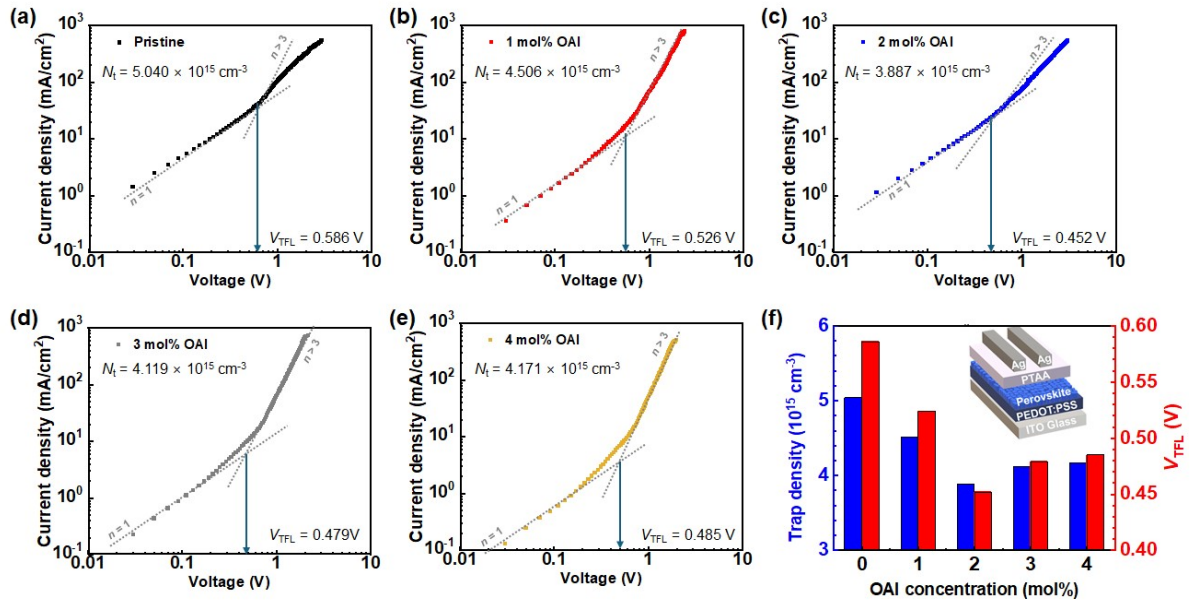

**Figure S7.** (a) Schematic illustration of hole-only device, and (b)  $J$ - $V$  curves of hole-only devices based on the perovskite films with and without OAI incorporation.

## References

- [S1] J. Jiang, Z. Chu, Z. Yin, J. Li, Y. Yang, J. Chen, J. Wu, J. You, X. Zhang, *Adv. Mater.* 2022, 34, 2204460.
- [S2] Y. Ye, Y. Li, X. Cai, W. Zhou, Y. Shen, K. Shen, J. Wang, X. Gao, I. Zhidkov, J. Tang, *Adv. Funct. Mater.* 2021, 31, 2105813.
- [S3] Z. Fang, W. Chen, Y. Shi, J. Zhao, S. Chu, J. Zhang, Z. Xiao, *Adv. Funct. Mater.* 2020, 30, 1909754.
- [S4] G. Cheng, Y. Liu, T. Chen, W. Chen, Z. Fang, J. Zhang, L. Ding, X. Li, T. Shi, Z. Xiao, *ACS Appl. Mater. Interfaces* 2020, 12, 18084.
- [S5] K. Wang, L. Wang, Y. Liu, Y. Song, Y. Yin, J. Yao, J. Yang, J. Wang, L. Feng, Q. Zhang, Q. Zhang, H. Yao, *Adv. Opt. Mater.* 2020, 2001684.
- [S6] M. Jiang, Z. Hu, L. K. Ono, Y. Qi, *Nano Res.* 2021, 14, 191. 17
- [S7] Y. Ke, N. Wang, D. Kong, Y. Cao, Y. He, L. Zhu, Y. Wang, C. Xue, Q. Peng, F. Gao, W. Huang, J. Wang, *J. Phys. Chem. Lett.* 2019, 10, 380.
- [S8] Y.-C. Ye, Y. Li, Y. Tian, X.-Y. Cai, Y. Shen, K.-C. Shen, X. Gao, F. Song, W. Wang, J.- X. Tang, *Nanoscale* 2021, 13, 340.
- [S9] S. Zhang, C. Yi, N. Wang, Y. Sun, W. Zou, Y. Wei, Y. Cao, Y. Miao, R. Li, Y. Yin, N. Zhao, J. Wang, W. Huang, *Adv. Mater.* 2017, 29, 1606600.
- [S10] X. Liang, Z. Liu, J. Zhang, H. Chen, Q. Gu, W. Zhang, C. Shen, Z. Xiao, Y. Wang, J. Liao, X. Wen, J. Xie, L. Yao, W. Cai, Y. Mo, J. Qing, S. Su, L. Hou
- [S11] D. Liu, X. Liu, G. Sun, F. Meng, Z. Liu, C. Shen, M. Li, S.J. Su, *ACS Appl. Mater. Interfaces* 2021, 13, 55412.
- [S12] P. Liu, W. Cai, C. Zhao, S. Zhang, P. Nie, W. Xu, H. Meng, H. Fu, G. Wei, *Adv. opt. mater.* 2021, 9, 2101419.
- [S13] L. Yang, Y. Zhang, J. Ma, P. Chen, Y. Yu, M. Shao, *ACS Energy Lett.* 2021, 6, 2386.
- [S14] J. Qing, S. Ramesh, Q. Xu, X.K. Liu, H. Wang, Z. Yuan, Z. Chen, L. Hou, T.C. Sum, F. Gao, *Adv. Mater.* 2021, 33, 2104381.
- [S15] N. Li, S. Apergi, C. Chan, Y. Jia, F. Xie, Q. Liang, G. Li, K. Wong, G. Brocks, S. Tao, N. Zhao, *Adv. Mater.* 2022, 34, 2202042.
- [S16] C. Yi, C. Liu, K. Wen, X.-K. Liu, H. Zhang, Y. Yu, N. Fan, F. Ji, C. Kuang, B. Ma, C. Tu, Y. Zhang, C. Xue, R. Li, F. Gao, W. Huang, J. Wang, *Nat. Commun.* 2020, 11, 4736.

- [S17] Y. Miao, X. Liu, Y. Chen, T. Zhang, T. Wang, Y. Zhao, *Adv. Mater.* 2021, 33, 2105699.
- [S18] G. Sun, X. Liu, Z. Liu, D. Liu, F. Meng, Z. Li, L. Chu, W. Qiu, X. Peng, W. Xie, C. Shen, J. Chen, H.-L. Yip, S.-J. Su, *Adv. Funct. Mater.* 2021, 31, 2106691.
- [S19] G. Cheng, Y. Liu, T. Chen, W. Chen, Z. Fang, J. Zhang, L. Ding, X. Li, T. Shi, Z. Xiao, *ACS Appl. Mater. Interfaces* 2020, 12, 18084.
- [S20] Y. Ke, N. Wang, D. Kong, Y. Cao, Y. He, L. Zhu, Y. Wang, C. Xue, Q. Peng, F. Gao, W. Huang, J. Wang, *J. Phys. Chem. Lett.* 2019, 10, 380.
- [S21] H. Shi, Z. Wang, H. Ma, H. Jia, F. Wang, C. Zou, S. Hu, H. Li, Z. Tan, *J. Mater. Chem. C* 2021, 9, 12367.
- [S22] B. Han, B. Cai, Q. Shan, J. Song, J. Li, F. Zhang, J. Chen, T. Fang, Q. Ji, X. Xu, H. Zeng, *Adv. Funct. Mater.* 2018, 28, 1804285.
- [S23] Y. Kuang, L. Yang, J. Ma, T. Bie, D. Zhang, Y. Xue, N. Zhou, M. Shao, *ACS Mater. Lett.* 2023, 5, 2922-2928.
